# Supplementary figures and images for: Proteomic Characterization of the Olfactory Molecular Imbalance in Dementia with Lewy Bodies
Source: MDPI journal article supplement (doi:10.3390/ijms21176371), 2020-09-02

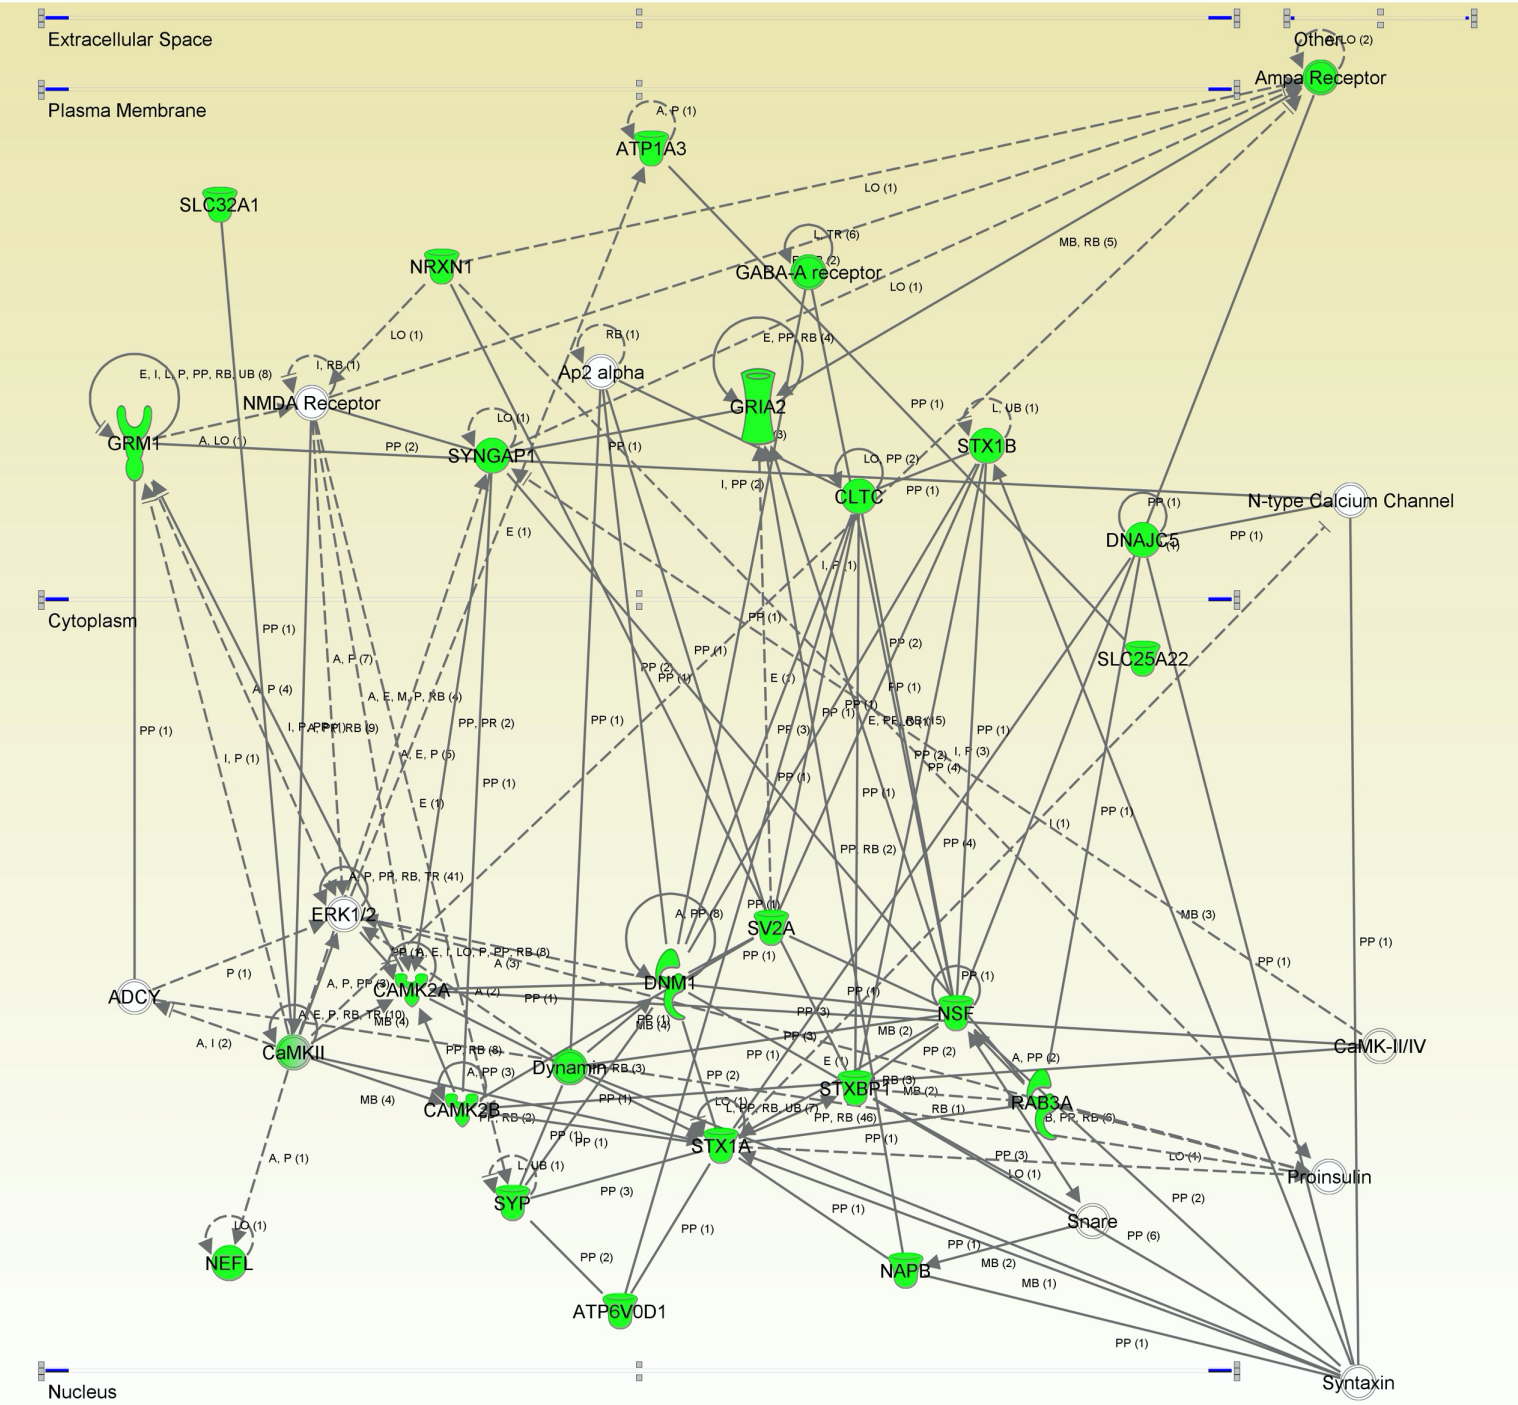

-Supplementary figure 5-

Supplement: s1 [file s1]
